# Supplementary material for: Factors Predicting Acute Brain Injury in Cases of Carbon Monoxide Poisoning: A Prospective Registry-Based Study
Source: MDPI journal article supplement (doi:10.3390/toxics9060120), 2021-05-27
Supplement: s1 [file s1]

# Factors Predicting Acute Brain Injury in Cases of Carbon Monoxide Poisoning: A Prospective Registry-Based Study

Hoon Lim, Young Hwan Lee, Sangun Nah, Sungwoo Choi, Young Soon Cho, Gi Woon Kim, Ji Eun Moon, Sangsoo Han

**Table S1.** Univariable logistic regression analysis for the factors predicting acute brain injury.

|                                                   | Odds Ratio | 95% CI         | P-Value |
|---------------------------------------------------|------------|----------------|---------|
| Age group                                         |            |                |         |
| < 20 years                                        | 1          |                |         |
| 20-39 years                                       | 3.405      | 0.4199–27.6184 | 0.251   |
| 40-59 years                                       | 8.262      | 1.0424–65.4868 | 0.046   |
| ≥ 60 years                                        | 7.000      | 0.7906–61.9762 | 0.080   |
| Male                                              | 1.372      | 0.748–2.516    | 0.307   |
| Comorbidities                                     |            |                |         |
| Hypertension                                      | 0.702      | 0.249–1.976    | 0.502   |
| Diabetes                                          | 2.004      | 0.436–9.215    | 0.372   |
| Current smoker                                    | 1.448      | 0.802–2.616    | 0.220   |
| Vital Signs                                       |            |                |         |
| Systolic blood pressure ≥ 140 mmHg                | 0.571      | 0.308–1.059    | 0.075   |
| Diastolic blood pressure ≥ 90 mmHg                | 0.597      | 0.316–1.129    | 0.153   |
| Heart rate > 100 /min                             | 0.981      | 0.511–1.881    | 0.953   |
| Respiratory rate > 16 /min                        | 0.247      | 0.040–1.511    | 0.151   |
| Intentional exposure                              | 2.246      | 1.110–4.542    | 0.024   |
| GCS score < 9                                     | 5.374      | 2.215–13.039   | <0.001  |
| Symptoms                                          |            |                |         |
| Headache                                          | 0.439      | 0.161–1.196    | 0.108   |
| Loss of consciousness                             | 1.354      | 0.684–2.677    | 0.384   |
| Dyspnea                                           | 0.426      | 0.050–3.609    | 0.434   |
| Chest pain                                        | 2.661      | 0.367–19.306   | 0.333   |
| Laboratory findings                               |            |                |         |
| White blood cell count > 10 × 10 <sup>3</sup> /uL | 4.208      | 1.916–9.244    | <0.001  |
| BUN > 17.71 mg/dL                                 | 5.787      | 2.922–11.501   | <0.001  |
| Creatinine > 1.2 mg/dL                            | 10.045     | 4.515–22.347   | <0.001  |
| Creatine Kinase > 1,000 U/L                       | 7.984      | 3.572–17.847   | <0.001  |
| pH < 7.2                                          | 5.726      | 0.508–64.487   | 0.158   |
| C-reactive protein > 9.2 mg/L                     | 10.503     | 4.530–24.354   | <0.001  |
| Hyperbaric oxygen therapy                         | 0.957      | 0.181–5.061    | 0.959   |

BMI, body mass index; BUN, blood urea nitrogen; CI, confidence interval; COHb, carboxyhemoglobin; GCS, Glasgow Coma Scale.
